# Supplementary material
Source: Springer Nature journal article supplement (https://www.springermedizin.de/resource/supplementary/12874_2009_402_MOESM2_ESM.pdf/9434402)

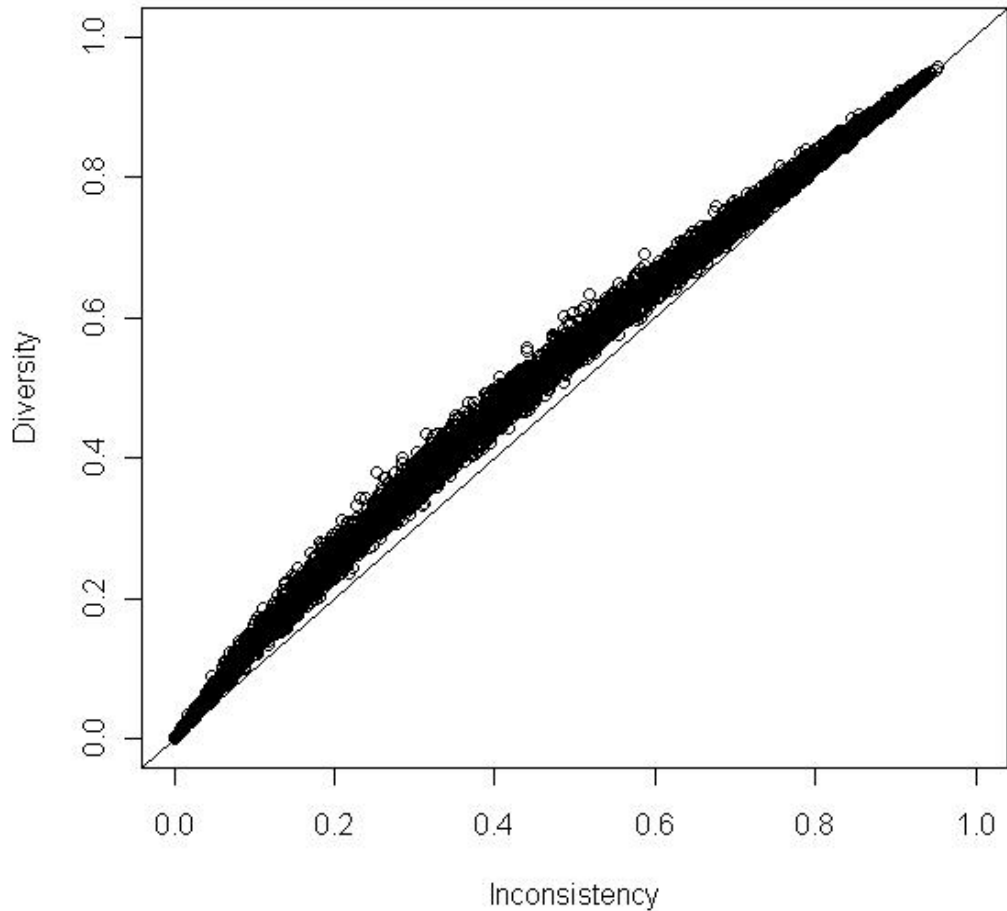

Supplement: MOESM2 [file 9434402]
